# Supplementary material for: Relationships among barodontalgia prevalence, altitude, stress, dental care frequency, and barodontalgia awareness: a survey of Turkish pilots
Source: PeerJ. 2024 Apr 19;12:e17290. doi: 10.7717/peerj.17290 (PMC11034504; doi:10.7717/peerj.17290)
Supplement: Supplemental Information 3 [file peerj-12-17290-s003.xlsx]

## Sheet: Form Yanıtları 1
Time stamp	I have read and understood the explanation text and agree to participate in the research voluntarily.	1. Gender Male: 1, Female: 2	2. Your age range 20 20–30: 1, 31–40: 2, 41–50: 3, 51 and above: 4	3. What is your field of aviation? Jet pilot: 1; Commercial pilot: 2	4. Have you ever heard of barodontalgia? Yes: 1; No: 0	5. How often do you go to the dentist? Every six months: 1, Once a year; 2, Only in case of complaints;	6. What is the treatment(s) performed during your visit? (You can select more than one option.) No treatment: 0, Filling: 1, Root canal treatment: 2, Extraction: 3, Implant: 4, Scaling: 5, Prosthodontic: 6, Orthodontic: 7	7. Have you ever stopped flying due to dental treatment? No: 0, Yes: 1	8. Did you have any problems with your flights immediately after treatment? No: 0, Yes: 1	9. Do you have the habit of clenching and/or grinding your teeth in your daily life? No: 0, Yes: 1, Don't know: 2	10. Do you clench your teeth during the flight? No: 0, Yes: 1, Don't know: 2	11. Does your habit of clenching your teeth cause pain in your jaw joint? Yes: 1, No: 0	12. Have you ever experienced a toothache during a flight? Never: 0, Once: 1, Twice: 2, Three or more times: 3	13. Please rate the intensity of the pain you experience during the flight on a scale of 1 to 5. None: 0, Very mild: 1, Mild: 2, Moderate: 3, Severe: 4, Very severe: 5	14. How would you describe the pain you feel? None: 0, Throbbing: 1, Tingling: 2	15. How long did you feel the pain during the flight? None: 0, a few seconds: 1, two to three minutes: 2, ten to fifteen minutes: 3, 30 minutes, and more: 4	16. At which stage of the flight did you feel the pain? (You can select more than one option.) None: 0, Take-off: 1, Landing: 2, Straight flight: 3, Continuous throughout the flight: 4	17. In what altitude range did you complain of pain? (You can choose more than one option.) None: 0, 0-2000 feet: 1, 2001-5000 feet: 2, 5001 feet and above: 3	18. Did your complaint of pain go away immediately after the flight? None: 0, Yes: 1, No: 2	19. Have you ever been examined by a dentist after flight-related complaints? Never: 0, Yes: 1, No: 2	20. According to the examination, what was the cause of your pain? (You can select more than one option.) None: 0, Not found: 1, Caries: 2, Old treatment (filling, root canal): 3, Bruxism: 4, Abscess: 5, Sinusitis: 6, Orthodontic: 7, Other: 8.
2022-11-19 22:54:31	I approve	1	2	2	0	3	2, 3, 5	0	0	2	1	0	0	0	0	0	0	0	0	0	0
2022-11-22 00:02:58	I approve	1	3	1	1	2	0	0	0	1	0	0	0	0	0	0	0	0	0	0	0
2022-11-23 15:03:58	I approve	1	2	2	0	1	1, 2	1	0	0	0	0	0	0	0	0	0	0	0	0	0
2022-12-23 10:06:35	I approve	1	4	2	1	2	1, 2, 5	0	1	0	0	0	2	4	1	4	3	3	1	1	8
2022-12-23 10:10:06	I approve	1	2	2	0	1	1, 2, 4, 5	0	0	1	0	1	3	3	1	4	2, 3	3	1	1	3, 4
2022-12-23 10:12:28	I approve	1	3	2	0	2	5	0	0	2	0	0	0	0	0	0	0	0	0	0	0
2022-12-23 10:12:48	I approve	1	4	2	1	1	2, 5	1	0	0	0	0	0	0	0	0	0	0	0	0	0
2022-12-23 10:16:22	I approve	1	2	2	0	2	1, 2	0	0	0	0	0	0	0	0	0	0	0	0	0	0
2022-12-23 10:23:25	I approve	1	4	2	0	3	1, 2	0	0	0	0	0	0	0	0	0	0	0	0	0	0
2022-12-23 10:26:23	I approve	1	2	2	1	1	1	1	1	1	0	1	1	4	1	4	3	3	1	1	3
2022-12-23 10:36:13	I approve	1	3	2	1	3	1, 2, 5	0	0	1	2	0	0	0	0	0	0	0	0	0	0
2022-12-23 10:38:30	I approve	1	4	2	0	3	5	0	1	1	0	0	0	0	0	0	0	0	0	0	0
2022-12-23 10:41:03	I approve	1	3	2	1	2	1, 2, 3, 5, 7	0	0	0	2	0	1	5	1	3	2	1	2	1	6
2022-12-23 10:41:58	I approve	1	2	2	0	3	1, 3, 4, 5	0	0	0	0	0	0	0	0	0	0	0	0	0	0
2022-12-23 10:43:02	I approve	1	4	1	1	1	1, 5	0	0	2	0	0	0	0	0	0	0	0	0	0	0
2022-12-23 10:47:36	I approve	1	2	2	0	3	1, 2, 5	0	0	2	1	1	2	3	2	3	1, 2, 3	1, 2, 3	2	1	3, 4
2022-12-23 10:48:05	I approve	1	3	2	1	3	1, 2, 3, 4, 5	0	0	0	0	0	0	0	0	0	0	0	0	0	0
2022-12-23 11:01:22	I approve	1	2	2	1	2	5	0	0	0	0	0	0	0	0	0	0	0	0	0	0
2022-12-23 11:02:07	I approve	1	4	2	1	1	1, 2, 5	1	0	0	0	0	0	0	0	0	0	0	0	0	0
2022-12-23 11:10:11	I approve	1	2	2	1	1	1, 2, 5, 7	0	0	0	0	0	0	0	0	0	0	0	0	0	0
2022-12-23 11:12:32	I approve	1	1	2	0	1	1, 5	0	0	2	0	0	0	0	0	0	0	0	0	0	0
2022-12-23 11:13:17	I approve	1	3	2	1	1	5, 0	0	0	0	0	0	0	0	0	0	0	0	0	0	0
2022-12-23 11:18:04	I approve	1	2	2	1	2	1, 2	0	0	0	0	0	0	0	0	0	0	0	0	0	0
2022-12-23 11:18:07	I approve	1	4	2	1	1	1, 2, 4, 5	0	0	1	1	1	0	3	1	4	3	3	2	1	1, 4
2022-12-23 11:25:42	I approve	1	3	2	0	2	1, 2, 3, 4, 5	0	0	1	0	0	0	0	0	0	0	0	0	0	0
2022-12-23 11:45:15	I approve	1	3	2	0	3	1, 2, 3, 5	0	0	0	0	0	0	0	0	0	0	0	0	0	0
2022-12-23 12:07:56	I approve	1	3	1	1	3	0	0	0	1	0	0	0	0	0	0	0	0	0	0	0
2022-12-23 12:19:01	I approve	1	1	2	1	2	1, 5	0	0	2	0	0	0	0	0	0	0	0	0	0	0
2022-12-23 12:51:46	I approve	1	2	2	1	2	1, 2, 5	0	0	2	0	0	0	0	0	0	0	0	0	0	0
2022-12-23 12:51:57	I approve	1	3	1	0	2	1, 5	1	0	0	0	0	1	3	1	3	2	2	2	1	2, 3
2022-12-23 13:00:30	I approve	1	4	2	0	2	1, 2	0	0	0	0	0	0	0	0	0	0	0	0	0	0
2022-12-23 13:17:47	I approve	1	4	2	1	3	1, 4, 0	0	0	0	0	0	3	1	2	3	3	3	2	1	2, 3
2022-12-23 13:33:03	I approve	1	3	2	0	1	1, 5, 0	0	0	1	0	0	0	0	0	0	0	0	0	0	0
2022-12-23 13:36:36	I approve	1	2	2	0	3	1, 2, 3, 4, 5	0	0	0	0	0	0	0	0	0	0	0	0	0	0
2022-12-23 13:40:54	I approve	1	2	2	1	3	5	0	0	2	0	0	1	3	2	3	2, 3	1, 2	2	2	0
2022-12-23 15:22:14	I approve	1	3	2	1	2	1, 5	0	0	0	0	0	0	0	0	0	0	0	0	0	0
2022-12-23 15:31:47	I approve	2	2	2	0	3	5	0	0	1	1	1	1	2	2	4	3	3	1	2	1
2022-12-23 16:29:22	I approve	1	2	1	0	1	1, 5	0	0	0	0	0	0	0	0	0	0	0	0	0	0
2022-12-23 16:49:28	I approve	1	4	2	0	3	4, 5	0	0	1	2	1	2	4	1	4	1, 3	3	2	1	2, 3
2022-12-23 17:00:11	I approve	1	2	2	0	2	1, 2, 3	0	0	0	0	0	0	0	0	0	0	0	0	0	0
2022-12-23 17:24:50	I approve	1	2	2	1	1	5, 7	0	0	0	0	0	0	0	0	0	0	0	0	0	0
2022-12-23 17:39:04	I approve	1	3	2	1	3	1, 2, 4	0	0	1	0	0	0	0	0	0	0	0	0	0	0
2022-12-23 18:17:04	I approve	1	3	1	0	2	5	0	0	0	0	0	0	0	0	0	0	0	0	0	0
2022-12-23 18:22:46	I approve	1	3	2	1	2	1, 4	0	0	0	0	0	0	0	0	0	0	0	0	0	0
2022-12-23 18:31:41	I approve	1	3	1	1	2	1	1	0	0	0	0	0	0	0	0	0	0	0	0	0
2022-12-23 18:49:32	I approve	1	3	1	1	2	1, 5, 0	0	0	1	2	0	0	0	0	0	0	0	0	0	0
2022-12-23 18:58:46	I approve	1	4	2	1	1	1, 2, 3, 4, 5, 7	1	0	1	0	1	2	3	1	3	2	2	2	1	1
2022-12-23 19:36:29	I approve	1	3	2	0	2	1, 5	0	0	1	0	0	2	2	2	3	3	3	1	1	2, 3
2022-12-23 20:23:04	I approve	1	3	1	1	3	1, 2, 4	1	0	1	0	0	0	0	0	0	0	0	0	0	0
2022-12-23 20:38:29	I approve	1	3	1	1	3	1, 2, 3, 5	0	1	1	0	0	1	4	1	3	1	2, 3	1	1	3
2022-12-23 20:54:38	I approve	1	3	1	1	3	1, 2	0	0	0	0	0	0	0	0	0	0	0	0	0	0
2022-12-23 20:57:44	I approve	1	3	1	1	3	1, 2, 3, 5	0	0	1	2	1	2	3	1	2	2	2	1	1	3
2022-12-23 21:17:19	I approve	1	3	1	1	3	1, 2	0	0	2	0	0	1	3	2	3	3	1, 2	2	2	0
2022-12-23 21:49:27	I approve	1	3	1	1	3	1, 5	1	1	0	0	0	2	4	1	3	2	1, 2	2	1	3
2022-12-23 22:05:48	I approve	1	3	2	0	3	1, 2, 3, 5	1	0	0	0	0	0	0	0	0	0	0	0	0	0
2022-12-24 00:14:30	I approve	1	2	2	0	1	1, 2, 4, 5, 7	0	0	1	0	1	0	0	0	0	0	0	0	0	0
2022-12-24 00:38:15	I approve	1	2	2	1	2	1, 5, 7	0	0	1	0	1	3	2	2	3	2	3	1	2	0
2022-12-24 07:39:19	I approve	1	3	1	0	3	1, 2	1	0	0	0	0	2	3	1	2	1, 2	3	1	2	3
2022-12-24 13:28:41	I approve	1	3	2	0	3	1, 2, 4	0	0	1	2	0	0	0	0	0	0	0	0	0	0
2022-12-24 21:44:45	I approve	1	3	2	1	3	1, 2, 3	0	0	0	0	0	0	0	0	0	0	0	0	0	0
2022-12-24 22:45:09	I approve	1	3	1	1	2	5	0	0	0	0	0	1	3	2	4	3	1	2	2	3
2022-12-24 23:10:29	I approve	1	3	1	0	3	1, 7	0	0	0	0	0	0	0	0	0	0	0	0	0	0
2022-12-25 12:39:28	I approve	1	3	1	1	1	2, 4, 5	0	0	0	0	0	0	0	0	0	0	0	0	0	0
2022-12-25 13:56:46	I approve	1	2	1	1	3	1, 2	1	0	0	0	0	3	5	1	4	3	3	1	1	2, 3
2022-12-25 14:40:48	I approve	1	2	1	1	3	1, 2, 5	0	0	0	0	0	0	0	0	0	0	0	0	0	0
2022-12-25 17:29:29	I approve	1	2	1	0	1	1, 2, 5	1	0	1	1	1	1	4	1	3	2, 3	1, 2, 3	2	1	3
2022-12-25 17:31:12	I approve	1	3	1	1	3	2	0	0	0	0	0	1	3	2	2	3	3	1	1	3
2022-12-25 17:34:54	I approve	1	3	1	0	3	1, 2, 5	1	0	0	2	0	0	0	0	0	0	0	0	1	3
2022-12-25 18:19:31	I approve	1	3	1	0	3	1, 2, 3, 4	1	0	0	0	0	0	0	0	0	0	0	0	0	0
2022-12-25 23:56:30	I approve	1	3	1	0	3	1, 3	1	0	0	0	0	1	3	2	3	2	1, 2	2	1	2, 3
2022-12-25 23:58:19	I approve	1	2	1	0	2	0	0	0	0	0	0	0	0	0	0	0	0	0	0	0
2022-12-26 04:44:14	I approve	1	2	1	1	1	4, 7	1	1	1	1	1	3	5	1	4	1, 2, 3	1, 2, 3	2	1	3
2022-12-26 05:36:59	I approve	1	3	1	0	3	1, 2, 3, 7	1	1	1	1	1	3	0	2	4	3	1, 2, 3	2	1	2, 4
2022-12-26 10:23:51	I approve	1	2	1	0	3	1, 5	0	0	0	0	0	0	0	0	0	0	0	0	0	0
2022-12-26 10:28:06	I approve	1	2	1	1	3	7	0	0	2	0	0	1	3	1	3	3	3	2	1	2
2022-12-26 10:28:19	I approve	1	2	1	0	2	5	0	0	0	0	0	0	0	0	0	0	0	0	0	0
2022-12-26 10:35:03	I approve	1	3	1	1	1	2, 3, 7	1	0	1	1	1	2	5	1	4	2, 3	1, 2, 3	2	1	3, 4
2022-12-26 10:44:34	I approve	1	1	1	0	2	0	0	0	0	2	0	0	0	0	0	0	0	0	0	0
2022-12-26 10:47:51	I approve	1	2	1	0	2	1, 4	0	0	1	1	0	0	1	0	0	0	0	0	0	0
2022-12-26 11:13:51	I approve	1	2	1	0	2	0	0	0	0	0	0	0	0	0	0	0	0	0	0	0
2022-12-26 11:31:28	I approve	1	2	1	1	3	0	0	0	0	0	0	0	0	0	0	0	0	0	0	0
2022-12-26 11:49:16	I approve	1	2	1	0	3	1, 5	0	0	2	2	0	0	0	0	0	0	0	0	0	0
2022-12-26 11:59:09	I approve	1	2	1	1	3	1, 2, 5	0	0	0	0	0	0	0	0	0	0	0	0	0	0
2022-12-26 12:58:20	I approve	1	3	1	1	3	1, 5	0	1	1	2	1	1	2	1	2	2	2	2	1	3
2022-12-26 14:54:36	I approve	1	2	1	1	3	3, 5	0	0	0	2	0	0	0	0	0	0	0	0	0	0
2022-12-26 15:34:31	I approve	1	3	2	0	3	1, 5	0	0	1	2	0	1	3	1	4	1, 2, 3	3	1	1	3, 4
2022-12-26 18:57:03	I approve	1	3	2	1	3	1, 2, 3, 4, 5	1	1	0	2	0	2	5	1	3	1, 2	3	1	1	3
2022-12-26 19:12:57	I approve	1	3	1	1	3	1, 2, 4	0	0	0	0	0	0	0	0	0	0	0	0	0	0
2022-12-26 20:13:43	I approve	1	3	1	1	1	2, 7	1	1	1	1	1	3	4	1	3	2	1, 2	2	1	3, 4
2022-12-26 20:20:35	I approve	1	2	1	1	3	1, 2, 4, 5	0	0	0	0	0	2	3	2	3	3	3	1	2	3
2022-12-26 20:38:13	I approve	1	2	1	1	3	1, 3, 5, 7	0	0	0	0	0	0	0	0	0	0	0	0	0	0
2022-12-26 23:34:27	I approve	1	3	2	1	1	1, 2	0	0	1	0	1	0	0	0	0	0	0	0	0	0
2022-12-27 07:32:24	I approve	1	3	1	0	3	1, 2, 3	1	1	1	1	1	2	5	1	3	2	1, 2	2	1	3, 4
2022-12-27 07:58:11	I approve	1	3	1	1	1	1, 2, 4, 6, 7	1	1	1	1	1	3	5	2	4	1, 2, 3, 3	1, 2, 3	2	1	2, 3, 4
2022-12-27 08:58:40	I approve	1	3	1	1	3	5	0	1	1	0	0	0	0	0	0	0	0	0	0	0
2022-12-28 12:19:13	I approve	1	2	1	1	1	1, 2, 3, 7	1	1	1	1	1	3	5	1	4	2, 3	1, 2	2	1	3, 4
2022-12-28 12:20:40	I approve	1	3	1	1	1	1, 2, 3, 7	1	1	1	1	1	3	5	1	4	2, 3	1, 2	2	1	2, 3, 4
2022-12-28 12:21:45	I approve	1	2	1	0	2	0	0	0	2	2	0	0	0	0	0	0	0	0	0	0
2022-12-28 12:23:16	I approve	1	3	1	0	2	5, 0	0	0	1	1	1	1	4	1	3	2	1, 2	2	1	4
2022-12-28 12:25:26	I approve	1	2	1	1	2	2, 7, 0	1	0	1	1	1	1	4	1	3	2	1, 2	2	1	3, 4
2022-12-28 12:27:14	I approve	1	2	1	0	1	1, 2, 3, 4, 7	1	1	1	1	1	3	5	1	4	1, 2, 3	1, 2, 3	2	1	3, 4
2022-12-28 13:52:50	I approve	1	3	2	1	1	1, 2, 4, 5	0	0	1	2	0	0	0	0	0	0	0	0	0	0
2022-12-28 14:05:51	I approve	1	3	2	1	2	1, 5	1	1	0	0	0	1	4	2	3	2	3	2	1	2
2022-12-28 14:13:55	I approve	1	3	2	1	1	1, 2	0	0	0	0	0	1	2	2	2	2	3	1	1	3
2022-12-28 14:14:06	I approve	1	3	2	1	1	2, 4	0	0	2	0	0	1	4	1	2	2	1	1	1	1
2022-12-28 14:16:41	I approve	1	3	2	0	3	1, 2, 5	0	0	1	0	1	0	0	0	0	0	0	0	0	0
2022-12-28 14:21:39	I approve	1	3	2	0	3	1, 5	0	0	1	2	1	0	0	0	0	0	0	0	0	0
2022-12-28 14:24:18	I approve	1	3	2	1	3	1, 2, 3, 4, 5	0	0	1	0	0	0	0	0	0	0	0	0	0	0
2022-12-28 14:35:22	I approve	1	4	2	1	3	1, 5	0	0	0	0	0	0	0	0	0	0	0	0	0	0
2022-12-28 14:36:53	I approve	1	4	2	1	2	1, 5	0	0	0	0	0	0	0	0	0	0	0	0	0	0
2022-12-28 14:38:01	I approve	1	3	2	0	2	1, 2, 5	0	0	1	0	0	0	0	0	0	0	0	0	0	0
2022-12-28 14:43:52	I approve	1	2	2	1	1	5	1	1	1	0	1	1	4	1	3	2	3	2	1	3
2022-12-28 15:23:47	I approve	1	4	2	1	2	1, 2	0	0	0	0	0	0	0	0	0	0	0	0	0	0
2022-12-28 16:25:39	I approve	1	3	2	1	3	5	0	0	0	0	0	0	0	0	0	0	0	0	0	0
2022-12-28 16:29:05	I approve	1	3	1	1	1	1, 2, 7	1	0	1	1	1	2	4	1	3	2	1, 2	2	1	3, 4
2022-12-28 16:55:47	I approve	1	4	1	0	2	4	1	1	1	0	0	0	0	0	0	0	0	0	0	0
2022-12-28 16:58:15	I approve	1	3	2	0	3	4, 5	0	0	1	0	0	0	0	0	0	0	0	0	0	0
2022-12-28 17:15:06	I approve	1	2	2	0	1	1, 5	0	0	0	0	0	0	0	0	0	0	0	0	0	0
2022-12-28 17:39:35	I approve	1	4	2	0	1	5	0	0	0	0	0	0	0	0	0	0	0	0	0	0
2022-12-28 18:52:13	I approve	1	3	2	1	3	1, 5	1	1	1	0	1	2	2	2	2	2, 3	3	2	2	0
2022-12-28 19:17:40	I approve	1	2	2	1	2	5	0	0	2	0	0	0	0	0	0	0	0	0	0	0
2022-12-28 19:25:13	I approve	1	4	2	1	3	1, 2	0	0	0	0	0	0	0	0	0	0	0	0	0	0
2022-12-28 19:27:27	I approve	1	1	1	0	1	1, 2, 3, 7	1	1	1	1	1	2	5	1	3	2, 3	1, 2, 3	2	1	2, 3, 4
2022-12-28 19:31:05	I approve	1	2	1	0	2	7, 0	0	1	1	2	1	1	5	1	4	2	1, 2	2	1	3
2022-12-28 19:35:56	I approve	1	4	1	1	1	1, 2, 3, 4, 7	1	1	1	1	1	3	5	1	4	1, 2, 3	1, 2, 3	2	1	3, 4, 8
2022-12-28 19:43:11	I approve	1	3	1	0	2	1, 2, 3, 0	1	0	0	2	0	1	4	1	3	2	1, 2	2	1	3
2022-12-28 19:53:25	I approve	1	1	2	1	2	1, 5	0	0	0	0	0	0	0	0	0	0	0	0	0	0
2022-12-28 19:56:29	I approve	1	4	2	1	3	1, 2	1	1	0	0	0	1	5	2	2	1	1	1	1	2
2022-12-28 20:07:27	I approve	1	3	1	0	1	1, 2, 3, 4	1	1	1	1	1	3	5	1	3	2	1, 2	2	1	2, 3, 4
2022-12-28 21:05:37	I approve	1	2	1	1	1	1, 2, 7	1	0	0	0	0	0	0	0	0	0	0	0	0	0
2022-12-28 21:09:55	I approve	1	2	1	1	1	1, 2, 3, 4	1	1	0	0	0	2	5	1	4	2, 3	1, 2, 3	2	1	2, 3
2022-12-28 21:12:57	I approve	1	3	1	1	3	5, 0	0	0	0	0	0	0	0	0	0	0	0	0	0	0
2022-12-28 21:52:17	I approve	1	3	1	1	1	1, 2, 3, 4, 7	1	1	1	1	1	3	5	1	4	1, 2, 3	1, 2, 3	2	1	2, 3, 4, 8
2022-12-28 23:22:50	I approve	1	2	2	1	1	1, 5	0	0	0	0	0	0	0	0	0	0	0	0	0	0
2022-12-29 10:40:05	I approve	1	4	2	1	2	1, 5, 0	1	1	0	0	0	0	0	0	0	0	0	0	0	0
2023-01-01 08:15:27	I approve	1	3	1	0	2	5, 0	0	0	0	0	0	0	0	0	0	0	0	0	0	0
2023-01-01 08:18:23	I approve	1	2	1	1	1	1, 2, 4	1	1	1	1	1	2	5	1	3	2, 3	1, 2, 3	2	1	3, 4, 8
2023-01-01 11:16:59	I approve	1	4	1	1	1	1, 2, 3, 4, 7	1	1	1	1	1	3	5	1	4	2, 3	1, 2, 3	2	1	2, 3, 4
2023-01-01 11:18:33	I approve	1	2	1	0	2	1, 2	0	1	1	1	1	1	5	1	3	2	1, 2	2	1	3, 4
2023-01-01 11:20:00	I approve	1	3	1	1	2	2, 7	0	1	1	1	1	2	5	1	4	2	1, 2	2	1	1
2023-01-01 11:21:50	I approve	1	3	1	0	3	1, 3, 5	0	0	1	1	1	1	3	2	2	2, 3	1, 2	1	1	1
2023-01-01 11:23:07	I approve	1	3	1	0	2	1, 2, 4	1	1	1	1	1	2	5	1	4	2	1, 2	2	1	3
2023-01-02 07:55:11	I approve	1	2	1	0	2	5, 0	0	0	1	1	1	0	0	0	0	0	0	0	0	0
2023-01-02 07:56:53	I approve	1	3	1	1	1	1, 2, 4, 7	1	1	1	1	1	2	5	1	4	2, 3	1, 2	2	1	2, 3, 4
2023-01-02 07:58:24	I approve	1	3	1	0	3	1, 3, 5	0	1	1	1	1	1	4	2	3	2	1, 2	2	1	2, 4
2023-01-02 08:00:30	I approve	1	1	1	0	2	0	0	0	1	1	1	1	3	1	3	2	1, 2	1	1	4
2023-01-02 08:02:05	I approve	1	2	1	1	1	1, 2, 3	1	1	1	1	1	2	4	1	3	2, 3	1, 2, 3	2	1	3
2023-01-02 08:04:10	I approve	1	3	1	1	1	1, 2, 3, 4, 5	1	1	1	1	1	3	4	1	4	2, 3	1, 2, 3	2	1	3, 5
2023-01-02 09:27:30	I approve	1	3	1	1	1	1, 2, 3, 7	1	0	1	1	1	2	4	1	3	2, 3	1, 2	2	1	2, 3, 4
2023-01-02 09:28:47	I approve	1	2	1	1	1	1, 2, 3	1	0	1	1	1	1	4	2	3	2	1, 2	1	1	2, 4
2023-01-02 09:30:37	I approve	1	3	1	0	1	2, 3	1	1	2	2	0	1	4	2	4	1, 2, 3	1, 2, 3	2	1	2, 3
2023-01-02 09:37:14	I approve	1	3	1	1	1	1, 2, 4	1	0	1	1	1	1	4	2	3	2	1, 2	2	1	2, 3
2023-01-02 15:00:23	I approve	1	1	2	1	3	1, 5	0	0	0	0	0	0	0	0	0	0	0	0	0	0
2023-01-02 16:56:30	I approve	1	2	1	1	2	5, 0	0	0	0	2	0	1	3	2	3	2, 3	1, 2, 3	1	1	2
2023-01-03 07:37:55	I approve	1	3	1	1	1	1, 2, 3	1	1	1	1	1	2	4	1	3	2	1, 2	2	1	3
2023-01-03 07:39:48	I approve	1	3	1	0	2	2, 5, 0	1	1	1	1	1	1	5	1	3	2	1, 2	2	1	3, 4
2023-01-03 07:44:40	I approve	1	2	1	1	1	1, 2, 7, 0	1	0	1	1	1	1	5	1	3	2	1, 2	2	1	2, 3
2023-01-03 11:29:25	I approve	1	3	2	1	1	1, 5	0	0	0	0	0	0	0	0	0	0	0	0	0	0
2023-01-03 11:35:59	I approve	1	2	2	1	2	1, 2	0	0	1	2	0	1	3	1	4	2	3	2	1	3
2023-01-03 11:40:33	I approve	1	3	2	0	3	5	0	0	2	0	0	0	0	0	0	0	0	0	0	0
2023-01-03 11:49:06	I approve	1	4	2	1	3	1, 2, 3, 4	1	0	1	0	0	1	3	1	4	2	3	2	1	2
2023-01-03 11:55:35	I approve	2	2	2	1	2	1, 5	0	0	0	0	0	3	2	2	2	1, 2	3	1	2	0
2023-01-03 12:11:09	I approve	1	4	2	1	3	1, 2, 4, 5	1	1	1	2	1	0	0	0	0	0	0	0	0	0
2023-01-03 12:46:16	I approve	1	2	2	0	3	1	1	0	1	1	0	0	0	0	0	0	0	0	0	0
2023-01-03 13:07:14	I approve	1	2	2	1	3	1, 2	1	1	0	0	0	1	5	1	4	2	1, 2	2	1	3
2023-01-03 13:32:38	I approve	1	2	2	1	2	5	0	1	2	2	0	1	3	2	3	1, 2	2	1	2	0
2023-01-03 13:34:29	I approve	1	4	2	0	3	2, 5	0	0	2	0	0	0	0	0	0	0	0	0	0	0
2023-01-03 13:51:33	I approve	1	2	2	1	2	1	0	0	0	0	0	2	4	2	2	2	3	1	1	2
2023-01-03 14:14:21	I approve	2	2	2	1	2	1, 5, 7	1	1	0	0	0	2	3	1	3	3	3	2	1	3
2023-01-03 14:30:05	I approve	1	2	2	1	2	1, 3	0	0	0	0	0	0	0	0	0	0	0	0	0	0
2023-01-03 15:15:05	I approve	1	2	2	1	2	1, 2, 3, 4, 5	0	0	0	0	0	1	3	2	3	2, 3	3	1	1	2
2023-01-03 15:38:18	I approve	1	2	2	1	3	1	0	0	2	2	0	2	4	2	3	2	2	1	2	0
2023-01-03 15:41:01	I approve	1	4	2	1	2	1, 2, 4, 5	0	0	0	0	0	0	0	0	0	0	0	0	0	0
2023-01-03 15:48:48	I approve	1	2	2	1	2	1, 2, 4, 5	0	0	1	1	1	0	0	0	0	0	0	0	0	0
2023-01-03 16:53:57	I approve	1	3	2	0	3	1, 4, 5, 7	0	1	0	0	0	2	3	2	2	1	3	1	2	3
2023-01-03 17:15:22	I approve	1	4	2	1	3	1, 3, 5, 7, 0	0	0	0	0	0	0	0	0	0	0	0	0	2	0
2023-01-03 18:42:43	I approve	1	1	2	1	2	1, 5	0	0	1	0	1	1	5	2	2	2	3	1	1	1, 3
2023-01-03 19:28:03	I approve	1	4	2	1	3	1, 2, 5	0	0	0	0	0	0	0	0	0	0	0	0	0	0
2023-01-03 21:34:56	I approve	1	2	1	0	3	5, 0	0	0	0	0	0	0	0	0	0	0	0	0	0	0
2023-01-03 21:36:29	I approve	1	3	1	1	1	1, 2, 3, 7	1	1	1	1	1	2	4	1	3	2, 3	1, 2	2	1	2, 3
2023-01-03 21:37:44	I approve	1	4	1	0	1	1, 2, 3, 7, 0	1	1	1	1	1	3	5	1	3	2, 3	1, 2, 3	2	1	2, 3, 4
2023-01-03 21:39:14	I approve	1	4	1	1	1	1, 2, 3, 4, 5	1	0	1	1	1	3	5	1	3	2, 3	1, 2	2	1	3
2023-01-03 21:40:39	I approve	1	3	1	1	1	1, 2, 3, 0	1	1	1	1	1	1	4	1	4	2, 3	1, 2	2	1	2, 4
2023-01-03 21:41:58	I approve	1	2	1	1	1	1, 2, 3, 4, 5	1	1	1	1	1	2	4	1	4	1, 2, 3	1, 2, 3	2	1	2, 3, 4
2023-01-04 00:26:28	I approve	1	2	2	1	3	1, 2, 3, 4, 5	0	0	0	0	0	0	0	0	0	0	0	0	0	0
2023-01-04 05:57:56	I approve	1	2	1	1	1	1, 2	1	1	1	1	1	1	3		2	2	1, 2	2	1	2
2023-01-04 05:59:20	I approve	1	3	1	1	2	2, 3	1	1	1	1	1	1	4	2	3	2	1, 2	2	1	2
2023-01-04 06:00:19	I approve	1	3	1	0	3	5, 0	0	0	0	0	0	0	0	0	0	0	0	0	0	0
2023-01-04 06:01:36	I approve	1	3	1	1	2	5, 0	0	0	1	1	1	1	3	2	2	2	1	1	2	2
2023-01-04 06:03:50	I approve	1	2	1	0	3	5	0	0	1	1	1	1	4	2	3	2	1, 2	2	1	3
2023-01-04 06:05:21	I approve	1	3	1	1	1	1, 2, 3	1	1	1	1	1	1	3	1	2	2	1	1	1	2
2023-01-04 06:07:15	I approve	1	3	1	1	2	1, 2, 3, 5	1	1	1	1	1	1	4	1	3	2	1, 2	2	1	3
2023-01-04 06:08:47	I approve	1	3	1	1	1	1, 2, 3, 4	1	1	1	1	1	1	4	1	2	2	1, 2	2	1	2, 3
2023-01-04 06:10:03	I approve	1	2	1	1	2	1, 2, 3, 4	1	1	1	1	1	1	4	1	2	2	1, 2	1	2	1
2023-01-04 06:11:23	I approve	1	3	1	0	3	1, 5	0	0	0	0	0	0	0	0	0	0	0	0	0	0
2023-01-04 06:12:43	I approve	1	3	1	1	2	1, 2	1	1	1	1	1	1	4	1	3	2, 3	1, 2	2	1	2, 4
2023-01-04 06:14:06	I approve	1	3	1	0	2	1, 5, 0	1	1	1	1	1	1	4	1	3	2	1, 2	2	1	2
2023-01-04 06:15:04	I approve	1	3	1	0	2	5, 0	0	0	2	2	0	0	0	0	0	0	0	0	0	0
2023-01-04 06:16:13	I approve	1	3	1	0	2	0	0	0	0	0	0	0	0	0	0	0	0	0	0	0
2023-01-04 06:17:21	I approve	1	2	1	1	1	1, 2, 3, 7	1	1	1	1	1	2	4	1	3	2, 3	1, 2	1	1	2, 3
2023-01-04 06:18:40	I approve	1	3	1	1	1	1, 2, 3, 7	1	1	1	1	1	1	4	1	3	2, 3	1, 2	2	1	2, 3, 4
2023-01-04 06:19:58	I approve	1	3	1	1	1	1, 2, 3, 4	1	1	1	1	1	2	4	1	3	2, 3	1, 2	1	1	2, 3, 4
2023-01-04 06:21:07	I approve	1	3	1	1	1	1, 2	1	1	1	2	1	2	4	1	4	2, 3	1, 2, 3	2	1	2, 3, 4
2023-01-04 06:22:11	I approve	1	3	1	1	1	1, 2, 7	1	0	1	1	1	2	4	1	3	2, 3	1, 2	2	1	2, 4
2023-01-04 06:23:29	I approve	1	3	1	1	2	1, 3, 4	1	1	1	1	1	2	5	1	3	2	1, 2	2	1	3
2023-01-04 18:38:37	I approve	1	3	2	1	3	1, 2, 3, 4, 5	1	0	1	0	0	0	0	0	0	0	0	0	0	0
2023-01-04 19:18:15	I approve	1	3	1	1	1	1, 2, 3	1	1	1	1	1	2	4	1	3	1, 2, 3	1, 2, 3	2	2	3, 4
2023-01-04 19:19:35	I approve	1	2	1	1	2	5, 0	0	0	2	2	0	0	0	0	0	0	0	0	0	0
2023-01-04 19:22:07	I approve	1	3	1	1	1	1, 2, 3, 4	1	1	1	1	1	2	5	1	4	2, 3	1, 2	2	1	3, 5
2023-01-04 19:23:43	I approve	1	4	1	0	1	2, 3, 4	1	1	1	2	1	3	5	2	4	3	1, 2, 3	2	1	2, 3, 4
2023-01-04 19:27:01	I approve	1	3	2	1	3	1, 4, 0	0	0	0	0	0	0	0	0	0	0	0	0	0	0
2023-01-04 20:47:32	I approve	1	2	1	1	1	1, 3, 7	1	1	1	1	1	1	4	2	3	2	1, 2	2	1	3
2023-01-04 22:51:20	I approve	1	4	1	1	3	1, 2, 0	1	1	1	1	1	2	4	2	3	2	1, 2	2	1	2, 3
2023-01-05 17:00:38	I approve	1	2	2	1	2	1, 2, 3, 5	0	0	1	1	1	3	2	2	3	1, 2	3	1	2	0
2023-01-05 20:29:54	I approve	1	2	1	1	2	1, 2, 3	1	1	1	1	1	2	4	1	3	2, 3	1, 2	2	1	2, 3, 4
2023-01-05 20:32:05	I approve	1	3	1	0	1	1, 2, 4, 0	1	0	0	2	0	1	4	2	4	1, 2, 3, 3	1, 2, 3	2	1	2
2023-01-05 20:36:02	I approve	1	4	1	0	3	1, 2, 3, 0	1	0	0	0	0	1	3	2	3	2	1, 2	1	1	2
2023-01-05 20:37:21	I approve	1	2	1	1	2	5, 0	0	0	2	2	0	0	0	0	0	0	0	0	0	0
2023-01-05 20:39:17	I approve	1	3	1	0	1	1, 2, 3, 4, 5, 0	1	1	1	1	1	3	4	1	4	2, 3	1, 2	2	1	3, 4
2023-01-05 21:31:40	I approve	1	3	1	1	1	1, 2, 3, 7	1	1	1	2	1	2	5	1	3	2	1, 2	2	1	2
2023-01-05 21:33:51	I approve	1	2	1	0	2	7, 0	1	0	2	2	0	1	3	2	3	2	1, 2	1	2	1
2023-01-05 21:34:42	I approve	1	2	1	0	3	5, 0	0	0	2	2	0	0	0	0	0	0	0	0	0	0
2023-01-05 21:37:12	I approve	1	3	1	0	2	7, 0	0	1	1	2	1	1	4	2	3	2, 3	1, 2	2	1	2, 4
2023-01-06 07:05:32	I approve	1	2	1	0	3	5, 0	0	0	2	2	0	0	0	0	0	0	0	0	0	0
2023-01-06 07:06:55	I approve	1	3	1	1	1	1, 2	1	0	1	1	1	1	3	1	3	2	1, 2	2	1	3
2023-01-06 07:08:38	I approve	1	3	1	1	1	1, 2, 3	1	1	1	1	1	1	5	1	4	2, 3	1, 2, 3	2	1	2, 3, 4
2023-01-06 07:12:02	I approve	1	3	1	1	1	1, 2, 3	1	1	1	1	1	2	5	1	3	2	1, 2	2	1	2
2023-01-06 07:13:30	I approve	1	4	1	0	2	1, 2, 0	1	1	2	2	0	1	4	1		2	1, 2	2	1	5
2023-01-06 07:15:15	I approve	1	2	1	1	1	1, 2, 3	1	1	1	1	1	2	4	1	4	1, 2, 3	1, 2, 3	2	2	3, 5
2023-01-06 07:17:03	I approve	1	2	1	1	1	1, 2, 3, 7	1	1	1	1	1	1	5	1	3	2	1, 2	2	1	2, 3
2023-01-06 07:18:07	I approve	1	2	1	0	2	0	0	0	2	2	0	0	0	0	0	0	0	0	0	0
2023-01-06 07:19:12	I approve	1	1	1	0	2	5, 0	0	0	0	0	0	0	0	0	0	0	0	0	0	0
2023-01-06 07:20:56	I approve	1	3	1	1	2	1, 2, 5, 0	1	1	2	2	0	1	4	2	3	2	1, 2	2	1	2
2023-01-06 07:23:42	I approve	1	2	1	1	1	1, 2, 0	1	1	1	1	1	1	5	2	4	2	1, 2	2	1	6
2023-01-06 07:24:59	I approve	1	3	1	1	1	1, 2, 3, 4	1	1	1	1	1	2	4	1	4	1, 2, 3	1, 2, 3	2	1	3, 4
2023-01-06 07:27:15	I approve	1	3	1	1	2	5, 7, 0	1	1	1	1	1	1	3	2	4	1, 2, 3, 3	1, 2, 3	2	1	7
2023-01-06 07:29:26	I approve	1	3	1	0	2	1, 2, 0	1	1	1	1	1	1	5	1	3	2	1, 2	2	1	2, 3
2023-01-06 07:31:42	I approve	1	3	1	1	1	4, 5, 6	1	1	1	1	1	2	5	1	4	1, 2, 3	1, 2, 3	2	1	3, 4
2023-01-06 07:32:51	I approve	1	3	1	0	2	5, 0	0	0	0	0	0	0	0	0	0	0	0	0	0	0
2023-01-06 07:35:36	I approve	1	3	1	1	1	1, 2, 3, 4	1	0	2	2	0	1	4	2	4	1, 2, 3	1, 2, 3	2	1	2, 5
2023-01-06 07:37:04	I approve	1	2	1	0	3	1, 5, 0	0	0	1	1	0	0	0	0	0	0	0	0	0	0
2023-01-06 07:38:10	I approve	1	3	1	1	1	1, 2, 3, 4, 6	1	1	1	1	1	2	5	1	4	2, 3	1, 2, 3	2	1	2, 3
2023-01-06 07:39:22	I approve	1	2	1	1	1	1, 2, 7	1	1	1	1	1	2	4	1	3	2	1, 2	2	1	3, 4
2023-01-06 12:07:38	I approve	1	3	1	0	1	1, 2, 3, 0	1	0	1	1	1	0	0	0	0	0	0	0	0	0
2023-01-06 12:09:44	I approve	1	2	1	1	2	7, 0	1	1	1	1	1	1	3	2	3	2	1, 2	1	1	4, 7
2023-01-06 12:11:02	I approve	1	3	1	1	1	4, 6, 0	1	1	1	1	1	2	5	1	4	1, 2, 3	1, 2, 3	2	1	3
2023-01-06 12:12:29	I approve	1	2	1	1	2	3, 5, 0	1	1	0	0	0	1	4	2	4	3	1, 2, 3	2	1	2
2023-01-06 12:13:48	I approve	1	2	1	1	1	1, 2, 6	1	1	0	0	0	1	4	1	3	2	1, 2	2	1	2, 3
2023-01-06 12:14:58	I approve	1	2	1	1	2	5, 0	0	0	2	2	0	1	3	2	3	2	1, 2	1	2	1
2023-01-06 12:16:32	I approve	1	3	1	1	1	1, 2, 3, 6	1	1	1	1	1	3	5	1	4	1, 2, 3	1, 2, 3	2	1	2, 3
2023-01-06 12:19:16	I approve	1	2	2	0	1	1, 2, 3, 4	1	1	2	2	0	2	4	1	4	2, 3	1, 2	2	1	8
2023-01-07 10:13:29	I approve	2	2	2	0	2	1	0	0	2	2	0	0	0	0	0	0	0	0	0	0
2023-01-07 14:25:54	I approve	1	3	2	0	3	1, 2	0	0	0	0	0	0	0	0	0	0	0	0	0	0
2023-01-07 22:48:28	I approve	1	2	1	1	1	1, 2, 3, 0	1	1	1	1	1	1	4	1	3	1, 2	1, 2	2	1	2, 3
2023-01-07 22:49:29	I approve	1	1	1	0	3	0	0	0	2	2	0	0	0	0	0	0	0	0	0	0
2023-01-07 22:51:32	I approve	1	2	1	1	1	1, 2, 3, 4, 6	1	1	1	1	1	2	4	1	3	1, 2	1, 2	2	1	2, 3, 4
2023-01-07 22:53:48	I approve	1	3	1	1	1	4, 5, 6	1	1	2	2	0	2	4	2	4	3	1, 2, 3	2	1	2, 4
2023-01-07 22:55:22	I approve	1	3	1	1	1	1, 2, 7, 0	1	1	1	1	1	3	5	1	3	2	1, 2	2	1	2, 3, 4
2023-01-08 20:02:29	I approve	1	2	2	0	3	1, 2, 5	0	0	1	0	1	0	0	0	0	0	0	0	0	0
8.01.2023 21:18:00	I approve	1	2	2	0	2	1, 2, 5	0	1	2	0	1	1	1	2	2	3	2	2	2	0
2023-01-09 03:33:45	I approve	1	3	1	1	1	1, 2, 3	1	1	1	1	1	2	4	1	3	2, 3	1, 2	2	1	3, 4
2023-01-09 03:38:21	I approve	1	4	1	0	3	1, 0	1	1	1	2	0	1	4	2	4	3	1, 2, 3	2	1	2
2023-01-09 03:39:35	I approve	1	3	1	1	1	1, 2, 4, 6	1	1	1	1	1	3	4	1	4	2, 3	1, 2, 3	2	1	3, 4
2023-01-09 03:40:41	I approve	1	2	1	1	2	0	0	0	0	0	0	0	0	0	0	0	0	0	0	0
2023-01-09 03:42:13	I approve	2	3	1	1	2	1, 5, 7, 0	0	0	0	0	0	0	0	0	0	0	0	0	0	0
2023-01-09 03:44:30	I approve	1	2	1	1	1	1, 2, 4, 5, 7, 0	1	1	1	1	1	2	4	1	3	2	1, 2	2	1	2, 3, 4
2023-01-09 03:46:12	I approve	1	3	1	0	2	1, 5, 7, 0	1	1	2	2	0	1	5	2	4	2, 3	1, 2, 3	2	1	3
2023-01-09 03:48:54	I approve	1	2	1	0	1	2, 4, 6, 0	1	1	1	1	1	3	4	1	4	2, 3	1, 2, 3	2	1	2, 3, 4
2023-01-09 03:50:32	I approve	1	3	1	0	1	1, 2, 3, 4	1	1	2	2	0	2	5	2	3	1, 2, 3	1, 2, 3	2	1	2, 3
2023-01-09 16:17:12	I approve	1	3	2	1	3	5	0	0	0	0	0	0	0	0	0	0	0	0	0	0
2023-01-10 17:36:00	I approve	1	3	1	1	1	1, 2, 6, 0	1	0	0	2	0	1	4	1	3	2	1, 2	2	1	2, 3
2023-01-10 17:48:00	I approve	1	2	1	1	3	0	0	0	0	0	0	0	0	0	0	0	0	0	0	0
2023-01-10 17:49:17	I approve	1	1	1	0	2	5, 0	0	0	1	1	1	1	3	2	4	3	1, 2, 3	2	1	4
2023-01-10 17:52:44	I approve	1	4	1	0	1	1, 2, 4	1	1	1	1	1	3	5	1	4	1, 2, 3	1, 2, 3	2	1	2, 3, 4
2023-01-10 17:53:32	I approve	1	1	1	0	2	5, 0	0	0	2	2	0	0	0	0	0	0	0	0	0	0
2023-01-10 17:56:03	I approve	1	3	1	1	1	7	1	1	1	1	1	2	4	1	4	1, 2, 3, 3	1, 2, 3	2	1	4, 7
2023-01-10 20:44:32	I approve	2	2	1	0	2	5, 7	1	0	0	0	0	0	0	0	0	0	0	0	0	0
2023-01-10 20:46:19	I approve	1	3	1	1	1	1, 2	1	1	1	0	0	1	3	1	3	2	1, 2	1	2	1
2023-01-10 20:47:59	I approve	1	2	1	1	1	6, 0	1	1	0	2	0	1	3	2	3	2	1, 2	1	2	1
2023-01-10 20:49:55	I approve	1	3	1	1	1	4, 5, 0	1	1	1	2	0	2	4	2	4	1, 2, 3	1, 2, 3	2	1	5
2023-01-10 20:52:01	I approve	2	3	1	0	2	2, 5, 0	1	1	1	1	1	1	3	1	3	2	1, 2	2	1	3
2023-01-10 20:55:17	I approve	1	3	1	1	1	1, 2, 3, 4	1	1	1	1	1	2	5	1	4	1, 2, 3, 3	1, 2, 3	2	1	2, 3
2023-01-10 20:56:39	I approve	1	2	1	0	2	5, 0	0	0	0	0	0	1	3	2	3	2	1, 2	1	2	1
2023-01-10 20:57:42	I approve	1	1	1	0	3	0	0	0	0	0	0	0	0	0	0	0	0	0	0	0
2023-01-10 20:58:39	I approve	2	2	1	0	2	5, 0	0	0	1	2	0	0	0	0	0	0	0	0	0	0
2023-01-10 21:00:36	I approve	1	4	1	1	1	1, 2, 3, 4, 5, 0	1	1	1	1	1	3	5	1	4	3	1, 2, 3	2	1	2, 3, 4, 5
2023-01-10 21:01:45	I approve	1	2	1	0	3	1, 2, 5, 0	1	1	1	1	1	1	5	1	3	2, 3	1, 2, 3	2	1	3
10.01.2023 23:24:42	I approve	2	2	2	1	1	1, 5	0	0	0	0	0	0	0	0	0	0	0	0	0	0
2023-01-11 17:18:48	I approve	1	3	2	0	3	1, 5	0	0	0	0	0	0	2	2	1	0	0	0	0	0
2023-01-11 23:09:49	I approve	1	2	1	0	3	5, 0	0	0	0	0	0	0	0	0	0	0	0	0	0	0
2023-01-11 23:12:22	I approve	1	3	1	1	1	1, 2, 3, 4	1	1	1	1	1	3	5	1	3	2	1, 2	2	1	3
2023-01-11 23:15:22	I approve	1	4	1	0	1	2, 3	1	1	1	2	0	2	4	2	3	2, 3	1, 2	2	1	2, 3, 4
2023-01-12 07:05:17	I approve	1	3	1	1	2	7, 0	0	0	1	1	0	0	0	0	0	0	0	0	0	0
2023-01-12 07:06:48	I approve	1	2	1	1	1	4, 6	1	1	1	1	1	2	4	1	3	2	1	2	1	2, 4
2023-01-12 07:08:41	I approve	1	3	1	0	1	1, 2, 0	1	1	1	1	1	1	4	1	4	2, 3	1, 2	2	1	2, 3
2023-01-12 07:10:01	I approve	2	2	1	1	2	1, 5, 0	0	1	0	0	0	1	3	2	3	2	1, 2	1	1	2
2023-01-12 07:11:01	I approve	1	1	1	0	2	0	0	0	0	0	0	0	0	0	0	0	0	0	0	0
2023-01-12 07:30:50	I approve	1	2	1	1	1	1, 2, 3, 4	1	1	1	1	1	2	4	1	4	2, 3	1, 2, 3	2	1	3, 4
2023-01-12 07:32:03	I approve	1	3	1	1	2	5, 0	0	0	1	1	1	1	3	2	3	1, 2, 3	1, 2, 3	1	1	4
2023-01-12 07:33:50	I approve	1	2	1	1	1	1, 2, 4	1	1	0	0	0	1	4	1	4	2	1, 2	2	1	3
2023-01-12 07:39:17	I approve	1	3	1	1	1	5, 7, 0	0	0	0	0	0	1	3	2	3	2	1, 2	2	1	7
2023-01-12 19:33:58	I approve	1	1	1	0	2	5, 0	0	0	0	0	0	0	0	0	0	0	0	0	0	0
2023-01-12 19:34:56	I approve	1	2	1	0	3	0	0	0	0	0	0	0	0	0	0	0	0	0	0	0
2023-01-12 19:35:55	I approve	1	3	1	0	2	0	0	0	0	0	0	0	0	0	0	0	0	0	0	0
2023-01-12 19:37:24	I approve	1	4	1	1	1	1, 2, 3, 4	0	1	1	2	1	3	4	1	4	2, 3	1, 2	2	1	2, 3, 4
2023-01-12 19:39:22	I approve	1	1	1	1	2	1, 5, 0	0	0	1	1	1	1	3	2	3	2	1, 2	1	1	2
2023-01-12 20:33:52	I approve	1	3	1	1	1	1, 2, 3, 6	1	1	1	1	1	3	4	1	4	1, 2, 3	1, 2, 3	2	1	2, 3, 4
2023-01-12 20:35:15	I approve	1	2	1	0	2	1, 5, 7, 0	0	0	1	1	1	1	3	2	2	2	1	1	1	2, 4
2023-01-12 20:36:37	I approve	1	4	1	0	1	1, 2, 4, 5, 6	1	1	0	0	0	2	5	1	3	2, 3	1, 2	2	1	3
2023-01-12 20:38:33	I approve	1	3	1	1	1	1, 2, 6, 7	1	1	0	0	0	1	3	1	3	2, 3	1, 2	2	1	2, 3
12.01.2023 15:36:49	I approve	1	4	2	1	3	1, 4	0	0	1	2	0	2	3	1	2	2	2	1	2	0
2023-01-15 12:24:08	I approve	1	2	2	1	2	2, 3	1	1	1	1	1	2	4	1	2	1, 2	2, 3	2	1	2, 3, 4
2023-01-15 12:25:29	I approve	2	1	2	1	3	4	1	1	1	1	1	3	4	2	3	3	3	1	1	1, 2
2023-01-15 12:44:21	I approve	1	1	1	0	2	5, 0	0	0	0	0	0	0	0	0	0	0	0	0	0	0
2023-01-15 12:45:11	I approve	1	2	1	0	3	1, 0	0	0	0	2	0	0	0	0	0	0	0	0	0	0
2023-01-15 12:45:52	I approve	1	3	1	0	2	5	0	0	0	0	0	0	0	0	0	0	0	0	0	0
2023-01-15 12:46:39	I approve	1	3	1	0	1	5, 0	0	0	0	2	0	0	0	0	0	0	0	0	0	0
2023-01-15 12:47:17	I approve	1	4	1	0	3	0	0	0	0	0	0	0	0	0	0	0	0	0	0	0
2023-01-15 12:57:08	I approve	1	2	2	0	1	1, 0	0	0	1	0	0	0	0	0	0	0	0	0	0	0
2023-01-15 12:57:25	I approve	1	2	2	1	3	1, 2, 5	0	0	0	0	0	0	0	0	0	0	0	0	0	0
2023-01-15 12:57:27	I approve	1	2	2	0	1	1, 5	0	0	0	0	0	3	3	2	1	1, 2, 3	3	1	1	1
2023-01-15 13:01:49	I approve	1	2	2	0	1	1, 2, 3, 4, 5, 7	0	0	1	0	0	0	0	0	0	0	0	0	0	0
2023-01-15 13:02:13	I approve	1	4	2	1	2	1, 2, 5	0	0	0	0	0	0	0	0	0	0	0	0	0	0
2023-01-15 13:03:23	I approve	1	3	2	0	2	1, 2, 3, 4, 5	0	0	0	0	0	0	0	0	0	0	0	0	0	0
2023-01-15 13:05:02	I approve	1	1	1	1	2	1, 5, 0	1	1	1	2	1	1	4	1	3	2	1, 2	2	1	2
2023-01-15 13:06:10	I approve	1	2	1	1	1	2, 4, 0	1	1	1	1	1	2	5	1	4	1, 2, 3	1, 2, 3	2	1	3, 4
2023-01-15 13:07:51	I approve	1	3	1	1	2	1, 2, 0	1	0	1	2	0	1	4	2	3	2	1, 2	1	2	1
2023-01-15 13:08:49	I approve	1	4	1	1	1	1, 2, 4	1	1	1	1	1	2	4	1	4	1, 2, 3, 3	1, 2, 3	2	1	3
2023-01-15 13:11:10	I approve	1	2	2	1	3	1, 2, 5	0	0	1	2	1	0	0	0	0	0	0	0	0	0
2023-01-15 13:11:36	I approve	1	4	1	1	3	1, 5, 0	1	1	1	1	1	3	4	1	4	2, 3	1, 2	2	1	2, 3
2023-01-15 13:26:51	I approve	1	3	2	0	3	0	0	0	2	0	0	0	0	0	0	0	0	0	0	0
2023-01-15 13:38:32	I approve	1	2	2	1	1	1, 2, 3, 5	0	0	1	0	0	0	0	0	0	0	0	0	0	0
2023-01-15 13:48:52	I approve	1	2	2	0	2	1, 5	0	0	1	0	0	0	0	0	0	0	0	0	0	0
2023-01-15 13:55:07	I approve	1	3	2	0	3	5	0	0	1	0	0	0	0	0	0	0	0	0	0	0
2023-01-15 13:59:08	I approve	1	3	2	1	3	1, 5	0	0	0	0	0	1	2	2	3	3	3	1	2	1
2023-01-15 14:02:48	I approve	1	3	2	0	3	1	0	0	0	0	0	0	0	0	0	0	0	0	0	0
2023-01-15 14:05:56	I approve	1	2	2	0	2	5	0	0	0	0	0	0	0	0	0	0	0	0	0	0
2023-01-15 14:12:03	I approve	1	2	2	0	2	1, 3, 4, 5	0	0	0	0	0	0	0	0	0	0	0	0	0	0
2023-01-15 14:16:16	I approve	1	3	2	1	3	1, 2, 3, 4, 5	0	0	1	1	1	0	0	0	0	0	0	0	0	0
2023-01-15 14:16:25	I approve	1	1	1	1	1	1, 2, 5, 0	1	1	1	1	1	2	4	1	3	2	1	2	1	3, 4
2023-01-15 14:17:33	I approve	1	2	1	1	1	1, 2, 3, 0	1	1	1	2	1	1	4	2	4	1, 2, 3, 3	1, 2, 3	2	1	2, 3, 4
2023-01-15 14:18:43	I approve	2	2	1	1	2	1, 5, 0	0	0	1	2	0	1	3	2	3	2	1, 2	2	1	2
2023-01-15 14:19:12	I approve	1	2	2	0	2	1, 2, 5	0	0	0	0	0	0	0	0	0	0	0	0	0	0
2023-01-15 14:19:20	I approve	1	2	2	1	2	1, 5	0	0	0	0	0	0	0	0	0	0	0	0	0	0
2023-01-15 14:19:29	I approve	1	1	1	1	2	5, 0	0	0	0	0	0	0	0	0	0	0	0	0	0	0
2023-01-15 14:19:55	I approve	1	2	2	0	2	1, 2, 4	0	0	1	0	0	1	3	2	3	2	3	2	1	3
2023-01-15 14:20:07	I approve	1	2	1	0	3	0	0	0	0	2	0	0	0	0	0	0	0	0	0	0
2023-01-15 14:20:54	I approve	1	3	1	0	3	5, 0	0	0	2	2	0	0	0	0	0	0	0	0	0	0
2023-01-15 14:21:55	I approve	1	3	1	0	3	5, 0	0	0	0	2	0	0	0	0	0	0	0	0	0	0
2023-01-15 14:22:32	I approve	1	4	1	0	2	0	0	0	0	0	0	0	0	0	0	0	0	0	0	0
2023-01-15 14:23:27	I approve	1	4	1	0	3	1, 5, 0	0	0	1	2	0	0	0	0	0	0	0	0	0	0
2023-01-15 14:24:52	I approve	1	1	1	0	2	1, 5, 0	0	0	1	1	1	1	3	2	3	2, 3	1, 2	1	1	2, 4
2023-01-15 14:26:03	I approve	1	2	2	0	3	2, 5	1	0	0	0	0	1	5	1	4	1	3	2	1	2
2023-01-15 14:26:11	I approve	1	2	1	1	2	1, 2, 6, 0	1	1	1	1	1	1	4	1	4	2	1, 2	2	1	2, 3
2023-01-15 14:28:52	I approve	1	3	1	1	1	1, 2, 3, 4, 5, 0	1	1	0	0	0	2	4	1	4	2, 3	1, 2	2	1	3, 6
2023-01-15 14:29:40	I approve	1	3	2	1	3	1, 2, 3, 4, 5	0	0	0	0	0	0	0	0	0	0	0	0	0	0
2023-01-15 14:30:00	I approve	1	2	1	1	2	1, 2, 3, 7	1	1	1	1	1	1	5	2	4	2	1, 2	2	1	3, 4, 5
2023-01-15 14:32:29	I approve	1	4	1	1	1	1, 2, 4, 5, 6	1	1	1	2	1	3	5	1	4	1, 2, 3	1, 2, 3	2	1	2, 3
2023-01-15 14:33:07	I approve	1	2	2	0	1	5	0	0	2	0	0	0	0	0	0	0	0	0	0	0
2023-01-15 14:34:12	I approve	2	3	1	1	1	1, 2, 5, 0	1	0	0	0	0	1	3	2	2	2	1, 2	1	1	2
2023-01-15 14:34:50	I approve	2	3	2	0	1	1, 2, 3, 4	1	1	1	2	1	2	4	1	4	1, 2	1, 2, 3	1	1	3, 4
2023-01-15 14:35:18	I approve	1	3	1	1	1	1, 2, 4, 6	1	1	1	1	1	1	5	1	4	1, 2, 3, 3	1, 2, 3	2	1	2, 3
2023-01-15 14:41:23	I approve	1	3	1	1	1	1, 2, 4, 5	1	1	0	0	0	2	4	1	3	2, 3	1, 2	2	1	2
2023-01-15 14:43:33	I approve	1	4	1	1	2	5, 7, 0	0	0	1	1	1	1	3	2	4	1, 2, 3, 3	1, 2, 3	2	1	4, 7
2023-01-15 14:44:46	I approve	1	1	1	0	2	5, 0	0	0	1	1	1	1	3	2	3	2	1, 2	1	1	4
2023-01-15 14:45:57	I approve	1	4	1	1	2	5, 7, 0	0	0	1	2	0	1	4	2	3	2	1, 2	2	1	2
2023-01-15 14:48:52	I approve	1	3	2	1	3	1, 5	0	0	1	1	0	0	0	0	0	0	0	0	0	0
2023-01-15 14:49:00	I approve	2	2	1	1	1	1, 2, 7, 0	1	1	1	2	1	2	4	1	4	2	1, 2	2	1	2, 3, 4
2023-01-15 14:49:59	I approve	1	4	1	1	1	1, 2, 3, 5, 0	1	1	0	0	0	2	5	1	3	2	1, 2	2	1	2, 3
2023-01-15 14:50:09	I approve	1	3	2	1	2	1, 2	0	0	0	0	0	1	2	2	3	2	3	2	1	3
2023-01-15 14:51:20	I approve	1	2	2	0	2	1, 2, 5	0	0	2	2	0	0	0	0	0	0	0	0	0	0
2023-01-15 14:51:21	I approve	1	3	1	1	1	1, 2, 3, 5	1	1	1	1	1	1	5	1	3	2, 3	1, 2	2	1	2, 3
2023-01-15 14:52:18	I approve	2	3	1	1	1	1, 2, 0	1	0	0	0	0	1	3	1	3	2	1, 2	2	1	2
2023-01-15 14:53:28	I approve	1	2	1	1	1	1, 5, 0	0	0	2	2	0	0	0	0	0	0	0	0	0	0
2023-01-15 14:55:35	I approve	1	2	2	1	3	2, 7	0	0	2	0	0	0	0	0	0	0	0	0	0	0
2023-01-15 15:02:03	I approve	1	2	2	0	3	1, 4, 5	0	0	1	2	0	2	3	1	2	2	3	2	1	3
2023-01-15 15:03:59	I approve	1	2	2	1	3	1	0	0	0	0	0	0	0	0	0	0	0	0	0	0
2023-01-15 15:08:09	I approve	1	3	2	0	3	1	0	0	0	0	0	0	0	0	0	0	0	0	0	0
2023-01-15 15:16:53	I approve	1	2	2	1	3	1, 5	0	0	0	0	0	0	0	0	0	0	0	0	0	0
2023-01-15 15:20:40	I approve	1	3	2	1	2	5	0	0	0	0	0	0	0	0	0	0	0	0	0	0
2023-01-15 15:45:26	I approve	1	3	2	1	1	1, 5	0	0	0	0	0	0	0	0	0	0	0	0	0	0
2023-01-15 16:15:58	I approve	1	2	2	1	1	1	0	0	0	0	0	0	0	0	0	0	0	0	0	0
2023-01-15 16:43:49	I approve	2	1	1	0	2	5, 0	0	0	1	1	1	1	3	2	3	1, 2, 3, 3	1, 2, 3	2	1	4
2023-01-15 16:45:00	I approve	1	1	1	0	2	5, 0	0	0	1	1	1	1	3	2	3	1, 2, 3, 3	1, 2	2	1	4
2023-01-15 16:46:25	I approve	1	4	1	0	1	1, 2, 4, 0	1	1	1	1	1	2	4	1	4	2	1, 2	2	1	2, 3
2023-01-15 16:48:54	I approve	1	2	1	1	1	4, 5, 0	1	1	0	0	0	2	4	1	4	2, 3	1, 2, 3	2	1	2, 3
2023-01-15 16:51:25	I approve	1	2	1	1	2	2, 5, 0	1	1	1	1	1	2	4	2	3	2, 3	1, 2	2	1	3, 4
2023-01-15 16:53:32	I approve	1	3	1	0	2	5, 0	0	0	1	2	0	1	3	2	3	2	1, 2	2	1	2
2023-01-15 16:56:53	I approve	1	3	1	1	1	5, 7, 0	0	1	0	0	0	1	3	2	4	3	3	2	1	7
2023-01-15 17:08:06	I approve	1	2	2	0	2	1, 2, 5	0	0	0	0	0	0	0	0	0	0	0	0	0	0
2023-01-15 17:10:15	I approve	1	3	1	0	3	1, 2, 4, 0	1	1	0	0	0	2	4	1	4	2, 3	1, 2, 3	2	1	2, 3
2023-01-15 17:14:30	I approve	1	2	1	1	3	1, 5, 0	0	0	0	0	0	1	4	1	3	2	1, 2	2	1	2
2023-01-15 17:15:36	I approve	1	2	1	0	2	0	0	0	1	2	0	0	0	0	0	0	0	0	0	0
2023-01-15 17:16:35	I approve	1	4	1	1	1	2, 4	1	1	1	1	1	3	5	1	4	1, 2, 3	1, 2, 3	2	1	2, 3, 4
2023-01-15 17:17:34	I approve	1	2	1	1	2	5, 0	0	0	0	0	0	1	3	1	3	2	1, 2	2	1	2
2023-01-15 17:19:15	I approve	1	3	1	0	1	1, 2, 0	1	1	1	2	1	2	4	1	4	2	1, 2	2	1	2, 3
2023-01-15 17:31:07	I approve	1	2	1	1	3	1, 5, 0	0	0	0	0	0	1	3	1	3	2	1, 2	1	1	2
2023-01-15 17:32:56	I approve	1	3	1	1	1	1, 2, 4	1	1	1	1	1	1	4	1	4	2	1, 2	2	1	2, 3
2023-01-15 18:11:19	I approve	1	2	2	1	2	1, 5, 7, 0	0	0	0	0	1	0	0	0	0	0	0	0	0	0
2023-01-15 18:27:58	I approve	1	2	2	1	3	5	0	0	2	0	0	1	2	1	2	2	3	2	2	0
2023-01-15 18:45:51	I approve	2	1	2	0	2	5, 0	0	0	0	0	0	0	0	0	0	0	0	0	0	0
2023-01-15 18:46:41	I approve	2	2	2	1	2	5, 7, 0	0	0	0	0	0	0	0	0	0	0	0	0	0	0
2023-01-15 18:47:30	I approve	2	3	2	1	2	1, 7	0	0	0	0	0	0	0	0	0	0	0	0	0	0
2023-01-15 18:48:15	I approve	1	1	2	1	2	5, 0	0	0	0	0	0	0	0	0	0	0	0	0	0	0
2023-01-15 18:49:07	I approve	1	2	2	1	2	1, 5, 0	0	0	0	0	0	0	0	0	0	0	0	0	0	0
2023-01-15 18:50:15	I approve	2	2	2	1	1	2, 7	1	1	0	0	0	1	4	1	3	2, 3	1, 2	2	1	2
2023-01-15 19:15:45	I approve	1	2	2	1	2	0	0	0	0	0	0	0	0	0	0	0	0	0	0	0
2023-01-15 19:22:07	I approve	1	2	2	0	3	1, 2, 5	0	0	1	2	1	0	0	0	0	0	0	0	0	0
2023-01-15 19:23:03	I approve	1	3	2	0	3	1, 2, 3, 5	1	1	0	0	0	1	3	1	4	3	3	1	1	8
2023-01-15 19:36:10	I approve	1	3	2	0	3	1, 2	0	0	0	0	0	0	0	0	0	0	0	0	0	0
2023-01-15 19:37:18	I approve	1	2	2	0	2	1, 5	0	0	1	2	1	0	0	0	0	0	0	0	0	0
2023-01-15 19:45:30	I approve	1	2	2	1	2	5	0	0	1	2	0	0	0	0	0	0	0	0	0	0
2023-01-15 19:54:41	I approve	1	3	2	1	3	1, 2	0	0	0	0	0	0	0	0	0	0	0	0	0	0
2023-01-15 20:05:37	I approve	1	3	2	0	3	1, 3, 4, 5	0	0	0	0	0	0	0	0	0	0	0	0	0	0
2023-01-15 20:29:05	I approve	1	3	2	1	1	1, 2, 5, 0	1	0	0	0	0	1	4	1	3	2	1, 2	1	1	2, 3
2023-01-15 20:30:30	I approve	2	2	2	1	2	1, 5, 0	0	0	1	1	1	1	3	1	2	2	1, 2	1	1	2, 4
2023-01-15 21:03:10	I approve	1	3	2	1	3	1, 2	0	0	1	2	0	1	0	2	3	3	3	1	1	3
2023-01-15 21:23:05	I approve	1	2	2	1	1	1, 4, 0	1	1	1	1	1	1	4	1	3	2, 3	1, 2, 3	2	1	2, 3
2023-01-15 21:35:53	I approve	1	3	2	1	2	1, 5, 0	0	0	1	1	1	1	4	1	4	2	1, 2	2	1	2, 4
2023-01-15 21:58:58	I approve	1	3	2	1	3	1, 5	0	0	0	0	0	0	0	0	0	0	0	0	0	0
2023-01-15 22:42:15	I approve	2	2	2	1	1	1, 2, 5, 0	1	1	1	2	1	1	4	1	4	2, 3	1, 2	2	1	2, 3
2023-01-15 22:44:30	I approve	1	3	2	1	3	1, 5	0	0	0	0	0	0	0	0	0	0	0	0	0	0
2023-01-15 22:44:55	I approve	1	3	2	1	2	5, 7, 0	0	0	1	1	1	1	3	2	4	1, 2, 3, 3	1, 2, 3	2	1	4, 7
2023-01-15 22:46:01	I approve	1	4	2	1	1	1, 2, 3, 4, 0	1	1	1	1	1	3	5	1	4	2, 3	1, 2, 3	2	1	2, 3, 4
2023-01-15 22:46:56	I approve	1	1	2	1	3	5, 7, 0	0	0	2	2	0	0	0	0	0	0	0	0	0	0
2023-01-15 22:48:12	I approve	1	2	2	1	2	1, 5, 0	0	0	1	1	1	1	3	1	3	2	1, 2	1	1	2, 4
2023-01-15 22:48:59	I approve	1	3	2	1	3	5, 0	0	0	1	1	0	0	0	0	0	0	0	0	0	0
2023-01-15 22:49:59	I approve	1	3	2	1	1	5, 7, 0	0	0	2	2	0	0	0	0	0	0	0	0	0	0
2023-01-15 22:51:10	I approve	1	4	2	1	1	1, 2, 4, 0	1	1	1	1	1	2	5	1	4	2, 3	1, 2, 3	2	1	2, 3, 4
2023-01-15 22:52:22	I approve	1	3	2	1	1	1, 2, 6	1	0	0	0	0	2	4	1	3	2	1, 2	2	1	3
2023-01-15 22:53:03	I approve	2	2	2	1	3	0	0	0	0	0	0	0	0	0	0	0	0	0	0	0
2023-01-15 22:53:50	I approve	1	1	2	1	2	5, 0	0	0	0	2	0	0	0	0	0	0	0	0	0	0
2023-01-15 22:55:05	I approve	1	3	2	1	2	5, 7, 0	0	0	1	1	1	1	3	2	4	2, 3	1, 2	2	1	7
2023-01-15 22:55:51	I approve	1	2	2	0	2	5, 0	0	0	0	0	0	0	0	0	0	0	0	0	0	0
2023-01-16 01:04:11	I approve	1	2	2	1	3	1, 4	0	1	1	0	1	3	3	1	4	1, 2	3	2	1	3, 4
2023-01-16 04:33:36	I approve	1	3	2	1	2	5, 7, 0	0	0	0	0	0	1	3	2	4	1, 2, 3	1, 2, 3	2	1	7
2023-01-16 04:35:25	I approve	1	2	2	1	1	1, 2, 0	1	1	1	1	1	1	5	1	4	2	1, 2	2	1	2, 3
2023-01-16 04:36:16	I approve	1	2	2	1	2	0	0	0	0	0	0	0	0	0	0	0	0	0	0	0
2023-01-16 04:37:05	I approve	1	1	2	0	3	0	0	0	2	2	0	0	0	0	0	0	0	0	0	0
2023-01-16 04:38:00	I approve	2	3	2	1	2	0	0	0	0	0	0	0	0	0	0	0	0	0	0	0
2023-01-16 04:39:07	I approve	1	3	2	1	1	3, 4	1	1	0	0	0	1	5	1	4	2	1, 2	2	1	2
2023-01-16 04:39:52	I approve	1	2	2	0	2	5, 7	0	0	1	1	1	0	0	0	0	0	0	0	0	0
2023-01-16 06:46:56	I approve	1	3	2	0	3	1, 2, 3	0	0	0	0	0	0	0	0	0	0	0	0	0	0
2023-01-16 07:40:43	I approve	1	2	2	0	3	1, 2	0	0	0	0	0	0	0	0	0	0	0	0	0	0
2023-01-16 12:09:32	I approve	1	2	2	1	3	1, 5	0	0	0	0	0	2	3	2	3	2, 3	3	2	1	3
2023-01-16 12:15:14	I approve	1	3	2	1	1	5	0	0	0	0	0	0	0	0	0	0	0	0	0	0
2023-01-16 13:22:33	I approve	1	4	2	1	2	4	0	0	2	1	0	1	2	2	4	3	3	2	1	3
2023-01-16 13:48:21	I approve	1	3	2	0	3	7	0	0	0	0	0	0	0	0	0	0	0	0	0	0
2023-01-16 16:51:51	I approve	1	1	2	1	2	0	0	0	1	1	0	0	0	0	0	0	0	0	0	0
2023-01-16 16:53:00	I approve	1	2	2	1	3	5, 0	0	0	1	2	0	0	0	0	0	0	0	0	0	0
2023-01-16 16:54:14	I approve	1	3	2	0	2	5, 0	0	0	1	1	0	0	0	0	0	0	0	0	0	0
2023-01-16 16:55:05	I approve	1	4	2	1	1	1, 5, 0	0	0	1	1	0	0	0	0	0	0	0	0	0	0
2023-01-16 16:55:55	I approve	2	1	2	0	2	5, 7, 0	0	0	0	0	0	0	0	0	0	0	0	0	0	0
2023-01-16 16:56:39	I approve	2	2	2	0	3	5, 0	0	0	0	0	0	0	0	0	0	0	0	0	0	0
2023-01-16 16:57:49	I approve	2	3	2	0	2	1, 5, 0	0	0	1	1	0	0	0	0	0	0	0	0	0	0
2023-01-16 16:59:08	I approve	1	4	2	1	1	1, 2, 4, 5, 6	1	1	1	1	1	2	4	1	4	1, 2, 3	1, 2, 3	2	1	2, 3, 4
2023-01-16 17:17:21	I approve	1	3	2	1	1	1, 2, 3, 5, 0	1	1	1	1	1	1	4	1	3	2	1, 2	2	1	2, 3
2023-01-16 17:20:34	I approve	1	2	2	0	2	1, 2, 5, 7	1	0	1	1	1	1	5	1	4	2, 3	1, 2	2	1	2, 3
2023-01-16 17:21:25	I approve	1	2	2	1	1	1, 2, 5	0	0	0	0	0	1	4	1	3	2	1	2	1	2
2023-01-16 17:22:16	I approve	1	3	2	1	1	1, 2, 4	1	1	1	1	1	3	5	1	4	1, 2, 3, 3	1, 2, 3	2	1	2, 3, 4
2023-01-16 17:23:24	I approve	1	2	2	0	3	5, 7, 0	0	0	1	1	1	1	3	2	3	2	1	1	1	1
2023-01-16 17:25:12	I approve	1	4	2	1	1	1, 2, 4	1	1	1	1	1	2	4	1	4	2, 3	1, 2	2	1	2, 3, 4
2023-01-16 17:26:44	I approve	1	3	2	1	1	4, 0	0	0	0	0	0	1	3	1	3	2	1, 2	2	1	3
2023-01-16 17:27:57	I approve	1	2	2	0	2	5, 0	0	0	2	2	0	0	0	0	0	0	0	0	0	0
2023-01-16 17:30:18	I approve	1	1	2	0	2	5, 0	0	0	1	1	1	1	3	2	3	1, 2, 3	1, 2	1	1	4
2023-01-16 17:31:56	I approve	1	2	2	1	1	1, 2, 5, 0	1	1	1	1	1	2	4	1	3	2	1, 2	2	1	2, 3, 4
2023-01-16 17:53:03	I approve	1	2	2	1	1	1, 2, 4, 5, 0	1	1	1	2	1	1	4	1	4	2, 3	1, 2	2	1	2, 3, 4
2023-01-16 18:20:54	I approve	1	2	2	1	2	0	0	0	0	0	0	0	0	0	0	0	0	0	0	0
2023-01-16 19:22:10	I approve	1	2	2	1	1	1, 2	1	0	1	1	1	1	4	1	4	2	1, 2	2	1	2, 3
2023-01-16 19:23:19	I approve	1	3	2	1	1	1, 2	1	1	1	1	1	2	5	1	3	2	1, 2	2	1	2, 3, 4
2023-01-16 19:24:16	I approve	1	3	2	0	2	5, 0	0	0	1	2	0	1	4	1	4	2, 3	1, 2, 3	2	1	2
2023-01-16 19:26:13	I approve	1	2	2	1	1	1, 2, 5, 0	1	1	1	1	1	2	4	1	4	2, 3	1, 2, 3	2	1	2, 3, 4
2023-01-16 19:27:07	I approve	1	3	2	0	3	1, 2	0	0	2	0	0	0	0	0	0	0	0	0	0	0
2023-01-16 19:27:08	I approve	1	4	2	1	1	4, 5, 0	1	1	0	0	0	1	5	1	4	2	1, 2	2	1	2, 3
2023-01-16 19:40:02	I approve	1	1	2	0	2	5, 0	0	0	0	0	0	0	0	0	0	0	0	0	0	0
2023-01-16 19:40:41	I approve	1	1	2	0	3	0	0	0	0	0	0	0	0	0	0	0	0	0	0	0
2023-01-16 19:42:00	I approve	2	1	2	0	2	1, 5, 0	0	0	2	2	0	1	2	2	2	2	1, 2	1	2	1
2023-01-16 19:42:56	I approve	1	4	2	1	1	6, 0	1	1	1	1	1	2	4	1	4	2, 3	1, 2, 3	2	1	2, 3, 4
2023-01-16 19:44:05	I approve	1	2	2	0	3	0	0	0	0	0	0	0	0	0	0	0	0	0	0	0
2023-01-16 19:46:12	I approve	1	1	2	1	2	1, 2, 5	0	0	1	1	1	1	4	2	3	2	1	2	1	2
2023-01-16 19:46:51	I approve	2	2	2	1	3	5, 7, 0	0	0	0	0	0	0	0	0	0	0	0	0	0	0
2023-01-16 19:47:44	I approve	1	3	2	0	1	1, 2, 4	0	0	0	0	0	2	3	1	3	2	1, 2	2	1	2
2023-01-16 19:58:20	I approve	2	2	2	0	2	5, 0	0	0	0	0	0	0	0	0	0	0	0	0	0	0
2023-01-16 19:59:38	I approve	1	3	2	1	1	1, 2, 4, 5	1	0	0	0	0	1	3	1	3	2	1, 2	1	1	2
2023-01-16 20:01:07	I approve	1	4	2	1	1	1, 2, 3, 4	1	1	1	1	1	2	4		4	2, 3	1, 2	2	1	2, 3, 4
2023-01-16 21:08:41	I approve	1	2	2	1	3	1, 2, 4, 5	0	1	1	1	1	3	3	1	1	2	3	1	2
2023-01-16 22:47:26	I approve	1	1	2	0	3	0	0	0	0	0	0	0	0	0	0	0	0	0	0	0
2023-01-16 22:48:05	I approve	1	2	2	1	2	5, 0	0	0	0	0	0	0	0	0	0	0	0	0	0	0
2023-01-16 22:48:38	I approve	1	3	2	1	2	5, 0	0	0	0	0	0	0	0	0	0	0	0	0	0	0
2023-01-16 22:49:21	I approve	1	3	2	0	3	1, 5, 0	0	0	0	0	0	0	0	0	0	0	0	0	0	0
2023-01-16 22:49:58	I approve	2	1	2	0	2	7, 0	0	0	0	2	0	0	0	0	0	0	0	0	0	0
2023-01-16 22:51:06	I approve	1	4	2	1	1	1, 2, 4	1	0	1	1	1	1	4	1	3	2	1, 2	1	1	2, 4
2023-01-16 22:51:44	I approve	2	1	2	0	3	0	0	0	0	2	0	0	0	0	0	0	0	0	0	0
2023-01-16 22:53:01	I approve	2	3	2	1	1	1, 2, 6	0	0	1	2	0	1	4	1	4	2, 3	1, 2, 3	1	1	2, 3, 4
2023-01-16 22:54:13	I approve	1	3	2	1	2	5, 0	0	0	0	0	0	1	3	2	3	1, 2, 3	1, 2, 3	1	1	2
2023-01-16 22:55:12	I approve	1	4	2	1	1	4, 5, 0	1	1	1	1	1	2	5	1	4	1, 2, 3	1, 2, 3	2	1	2, 3, 4
2023-01-16 22:56:30	I approve	1	3	2	1	2	1, 5, 0	0	0	2	2	0	1	3	2	3	2	1	2	1	2, 3
2023-01-16 22:57:16	I approve	1	2	2	0	3	5, 0	0	0	2	2	0	0	0	0	0	0	0	0	0	0
2023-01-16 22:58:05	I approve	1	2	2	0	2	5	0	0	2	2	0	0	0	0	0	0	0	0	0	0
2023-01-16 22:58:51	I approve	1	1	2	0	3	0	0	0	2	2	0	0	0	0	0	0	0	0	0	0
2023-01-16 22:59:49	I approve	2	2	2	1	2	1, 5, 7, 0	0	0	1	1	1	1	3	2	3	2	1, 2	2	1	2
2023-01-16 23:04:20	I approve	1	2	2	1	2	1, 4, 0	0	0	0	0	0	0	0	0	0	0	0	0	0	0
16.01.2023 18:34:49	I approve	1	2	2	0	3	1, 5, 7	0	0	0	0	0	2	2	2	2	3	3	1	1	1
2023-01-17 07:08:08	I approve	1	2	2	0	2	1, 2, 5, 0	1	1	1	1	1	1	4	1	3	2	1, 2	2	1	2, 3, 4
2023-01-17 07:09:36	I approve	1	3	2	1	1	1, 2, 4	1	1	0	0	0	2	5	1	4	2, 3	1, 2, 3	2	1	2, 3
2023-01-17 07:10:36	I approve	1	1	2	0	3	5, 0	0	0	0	2	0	0	0	0	0	0	0	0	0	0
2023-01-17 07:11:20	I approve	2	1	2	0	3	5, 0	0	0	0	0	0	0	0	0	0	0	0	0	0	0
2023-01-17 07:12:27	I approve	1	3	2	1	2	1, 5	0	0	0	0	0	1	3	1	3	2	1	1	1	2
2023-01-17 07:13:43	I approve	1	4	2	1	1	4, 0	1	1	1	1	1	2	5	1	4	2, 3	1, 2, 3	2	1	2, 3
2023-01-17 07:15:01	I approve	1	2	2	0	2	5, 7, 0	0	0	0	0	0	1	3	2	2	2	1, 2	1	2	1
2023-01-17 07:15:56	I approve	1	3	2	0	3	5, 0	0	0	0	0	0	0	0	0	0	0	0	0	0	0
2023-01-17 07:17:24	I approve	2	2	2	1	1	1, 2, 7	1	0	0	2	0	1	4	1	4	2, 3	1, 2	2	1	2, 3
2023-01-17 07:18:40	I approve	1	2	2	0	2	1, 5, 0	0	0	2	2	0	1	3	2	3	2	1, 2	1	1	2
2023-01-17 07:19:44	I approve	1	3	2	1	1	1, 2, 3, 4, 5, 0	1	1	1	1	1	3	5	1	4	1, 2, 3	1, 2, 3	2	1	2, 3, 4
2023-01-17 07:24:22	I approve	1	2	2	0	2	2	1	1	0	0	0	0	0	0	0	0	0	0	0	0
2023-01-17 07:33:02	I approve	1	2	2	0	2	1, 2, 5	0	1	1	2	0	2	2	2	4	3	3	2	2	0
2023-01-17 09:03:36	I approve	1	3	2	1	1	1, 2, 4, 6	1	1	0	0	0	3	5	1	4	2, 3	1, 2, 3	2	1	2, 3
2023-01-17 09:04:15	I approve	1	2	2	0	3	5, 0	0	0	0	2	0	0	0	0	0	0	0	0	0	0
2023-01-17 09:05:49	I approve	1	3	2	1	2	1, 2, 5, 0	0	0	1	1	1	1	5	1	3	2	1, 2	2	1	2, 3, 4
2023-01-17 09:19:09	I approve	1	3	2	0	3	1, 2, 3, 4, 5, 7	0	0	0	0	0	0	0	0	0	0	0	0	0	0
2023-01-17 20:07:32	I approve	1	2	2	1	2	1, 2, 5	0	0	0	0	0	0	0	0	0	0	0	0	0	0
2023-01-17 21:10:48	I approve	1	3	2	1	3	1, 2	0	0	0	0	0	0	0	0	0	0	0	0	0	0
2023-01-18 10:36:58	I approve	1	3	2	1	3	0	0	0	2	0	0	0	0	0	0	0	0	0	0	0
2023-01-22 21:31:43	I approve	1	3	2	1	3	1, 2	0	0	0	0	0	0	0	0	0	0	0	0	0	0
2023-01-24 12:19:30	I approve	1	3	2	1	2	1, 2, 5	0	0	0	0	0	0	0	0	0	0	0	0	0	0
2023-01-24 18:23:38	I approve	1	3	2	0	2	1, 2, 5	0	0	1	0	0	0	0	0	0	0	0	0	0	0
